# Supplementary material
Source: PubMed Central journal article supplement (PMC3040716)

# SUPPLEMENTAL FIGURE 1

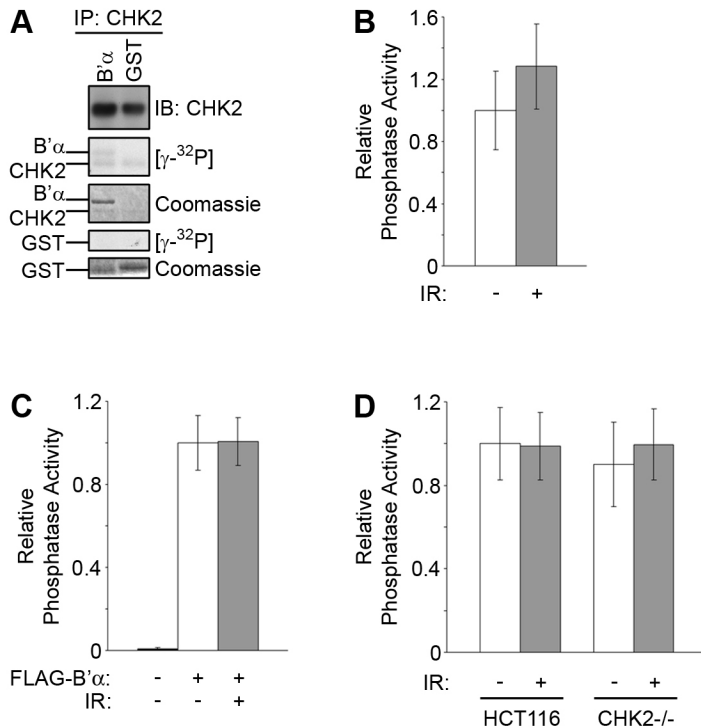

## SUPPLEMENTAL FIGURE 2

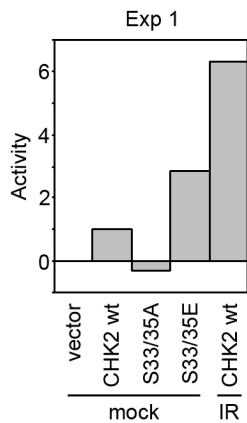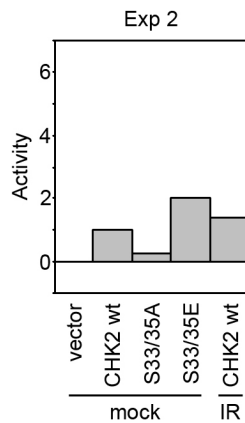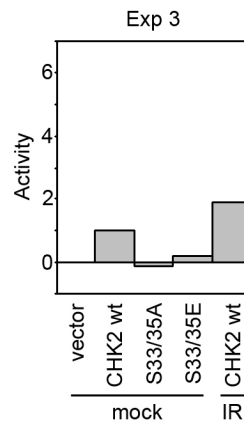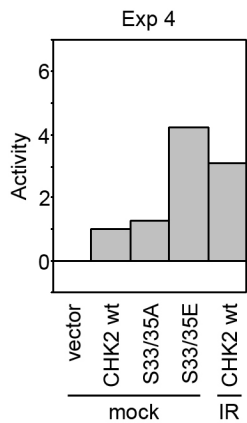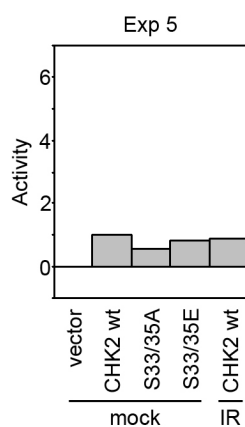

Supplement: NIHMS265425-supplement-Supplimentary.pdf [file NIHMS265425-supplement-Supplimentary.pdf]
